# Supplementary material for: Synthesis, optical, electrochemical properties and photovoltaic performance of novel panchromatic meso-thiophene BODIPY dyes with a variety of electron-donating groups at the 3,5-positions
Source: Royal Society of Chemistry journal article supplement (doi:10.1039/c5ra15389a), 2015-01-01
Supplement: c5ra15389a1.pdf [file c5ra15389a1.pdf]

## Supplementary Information

### Synthesis, optical, electrochemical properties and photovoltaic performance of novel panchromatic meso- thiophene BODIPY dyes with a variety of electron-donating groups at 3,5-positions

Junxu Liao,<sup>a</sup> Yongjun Xu,<sup>b</sup> \* Hongbin Zhao,<sup>b</sup> Yucai Wang,<sup>b</sup> Wentao Zhang,<sup>b</sup> Fei Peng,<sup>b</sup> Shengjie Xie<sup>b</sup> and Xiaoxi Yang<sup>a, b</sup>

<sup>a</sup> School of Chemistry and Chemical Engineering, South China University of Technology, Guangzhou 510641, People's Republic of China

<sup>b</sup> College of Energy and Chemical Engineering, Dongguan University of Technology, Dongguan 523808, People's Republic of China

#### Table of contents:

|                                                                                                 |     |
|-------------------------------------------------------------------------------------------------|-----|
| <b>Fig.1</b> Absorption spectra of BDP1-5 in CH <sub>2</sub> Cl <sub>2</sub> solution .....     | S2  |
| <b>Fig.2</b> The comparison of absorption spectra of BDPs in solution and in film ...           | S2  |
| <b>Fig.3</b> Fluorescence spectra of BDP1-5 recorded in different solutions .....               | S3  |
| <b>Fig.4, Fig.5</b> <sup>1</sup> H NMR and <sup>13</sup> C NMR spectra of compound 1 .....      | S4  |
| <b>Fig.6, Fig.7</b> <sup>1</sup> H NMR and <sup>13</sup> C NMR spectra of compound 2 .....      | S5  |
| <b>Fig.8, Fig.9</b> <sup>1</sup> H NMR and <sup>13</sup> C NMR spectra of compound 3 .....      | S6  |
| <b>Fig.10, Fig.11</b> <sup>1</sup> H NMR and <sup>13</sup> C NMR spectra of compound 4 .....    | S7  |
| <b>Fig.12</b> <sup>1</sup> H NMR spectrum of compound 9 .....                                   | S8  |
| <b>Fig.13</b> <sup>1</sup> H NMR spectrum of compound 10.....                                   | S8  |
| <b>Fig.14, Fig.15</b> <sup>1</sup> H NMR and <sup>13</sup> C NMR spectra of compound BDP1 ..... | S9  |
| <b>Fig.16, Fig.17</b> <sup>1</sup> H NMR and <sup>13</sup> C NMR spectra of compound BDP2 ..... | S10 |
| <b>Fig.18, Fig.19</b> <sup>1</sup> H NMR and <sup>13</sup> C NMR spectra of compound BDP3 ..... | S11 |
| <b>Fig.20, Fig.21</b> <sup>1</sup> H NMR and <sup>13</sup> C NMR spectra of compound BDP4 ..... | S12 |
| <b>Fig.22, Fig.23</b> <sup>1</sup> H NMR and <sup>13</sup> C NMR spectra of compound BDP5 ..... | S13 |

---

\* Corresponding author. Tel.: +86-769-2286-2605; fax: +86-769-2286-2605; e-mail: hnllxyj@126.com.

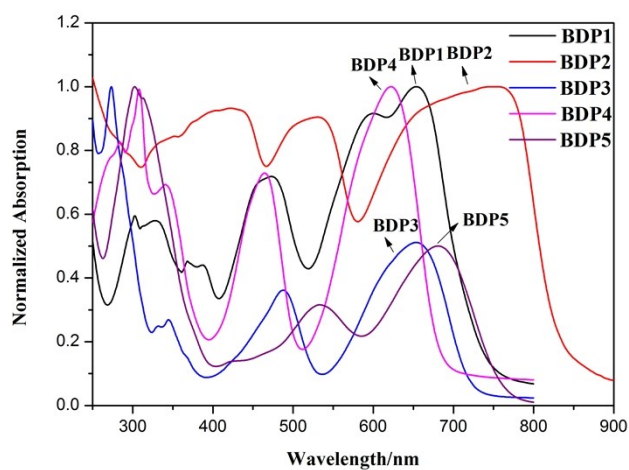

**Fig. 1** Absorption spectra of **BDP1-5** in  $\text{CH}_2\text{Cl}_2$  solution.

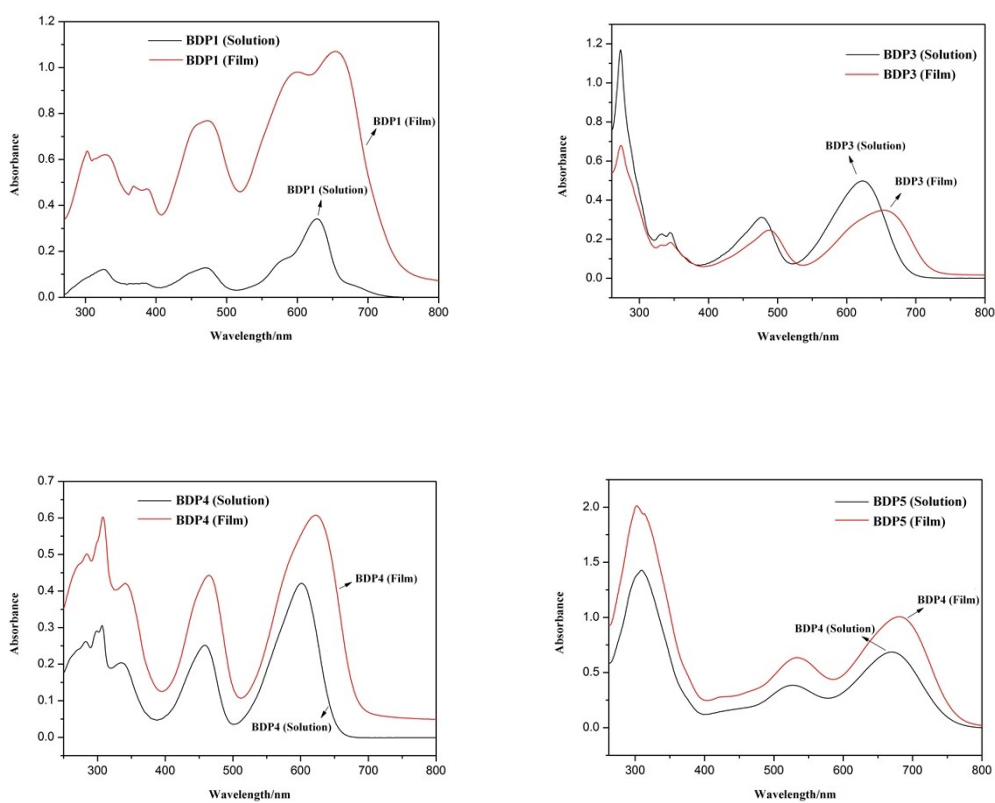

**Fig. 2** The comparison of absorption spectra of **BDPs** in solution and in film.

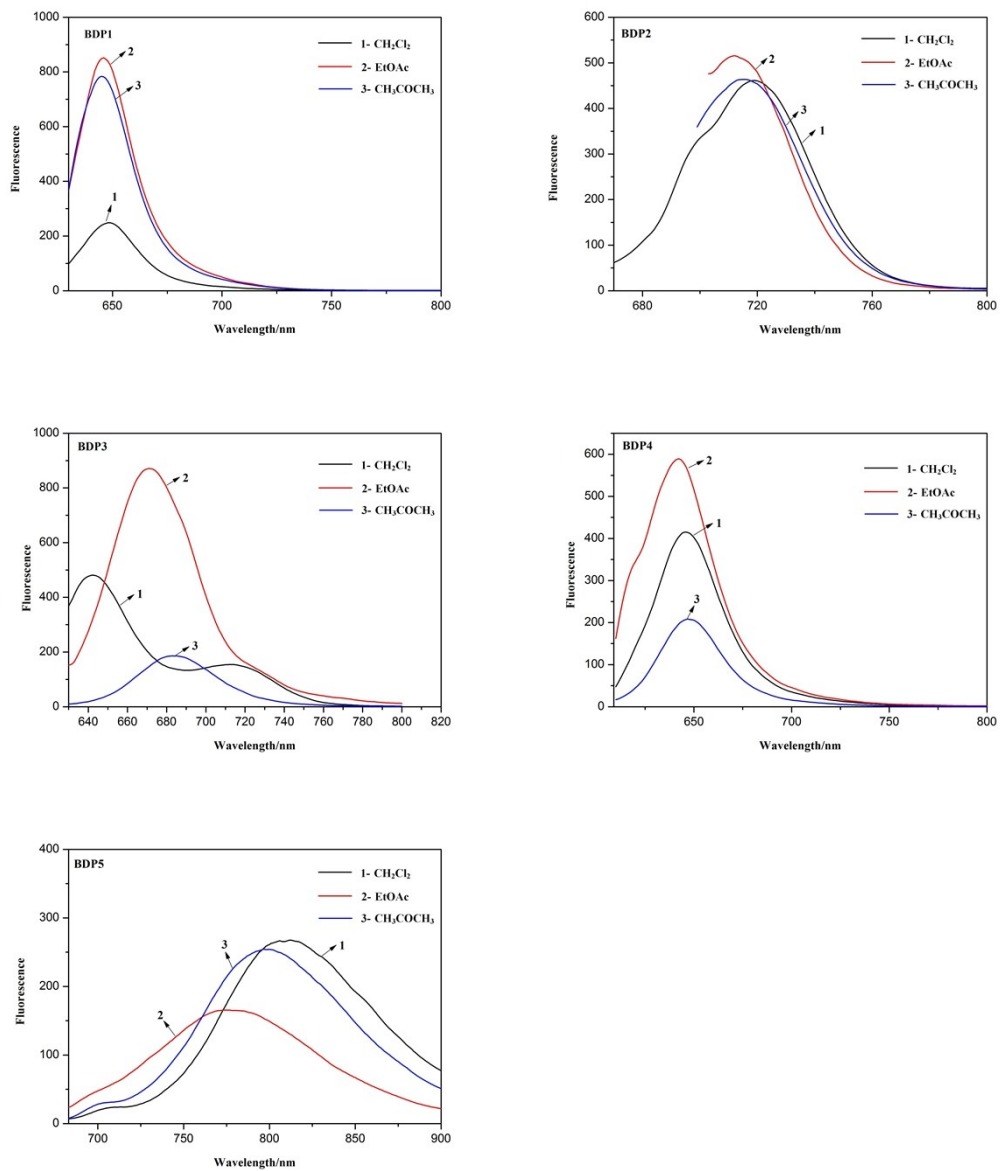

**Fig. 3** Fluorescence spectra of **BDP1-5** recorded in different solutions.

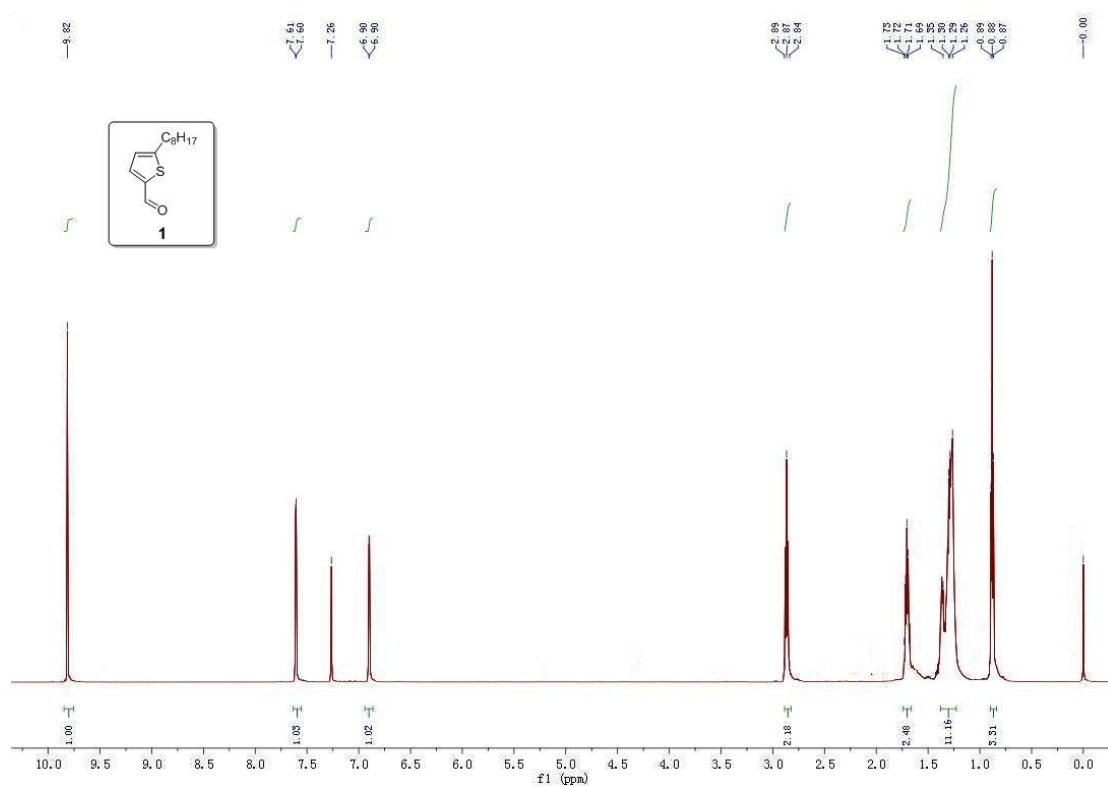

**Fig. 4**  $^1\text{H}$  NMR spectrum of compound **1**

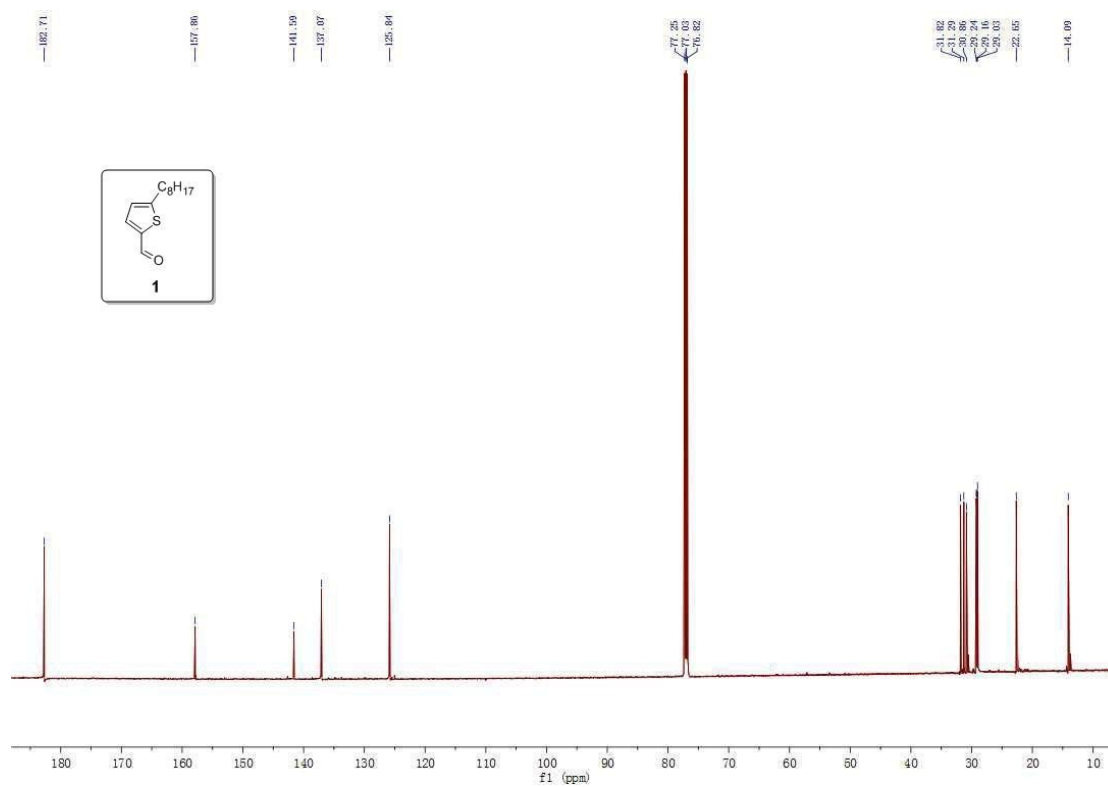

**Fig. 5**  $^{13}\text{C}$  NMR spectrum of compound **1**

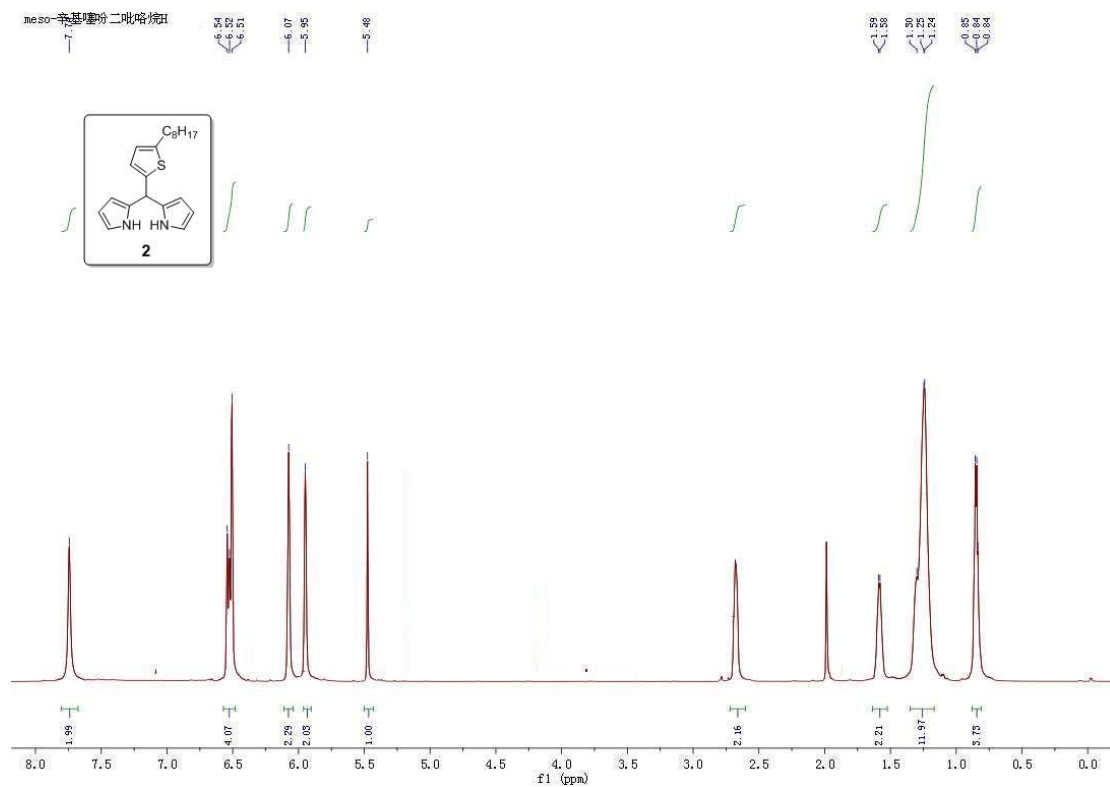

**Fig. 6**  $^1\text{H}$  NMR spectrum of compound **2**

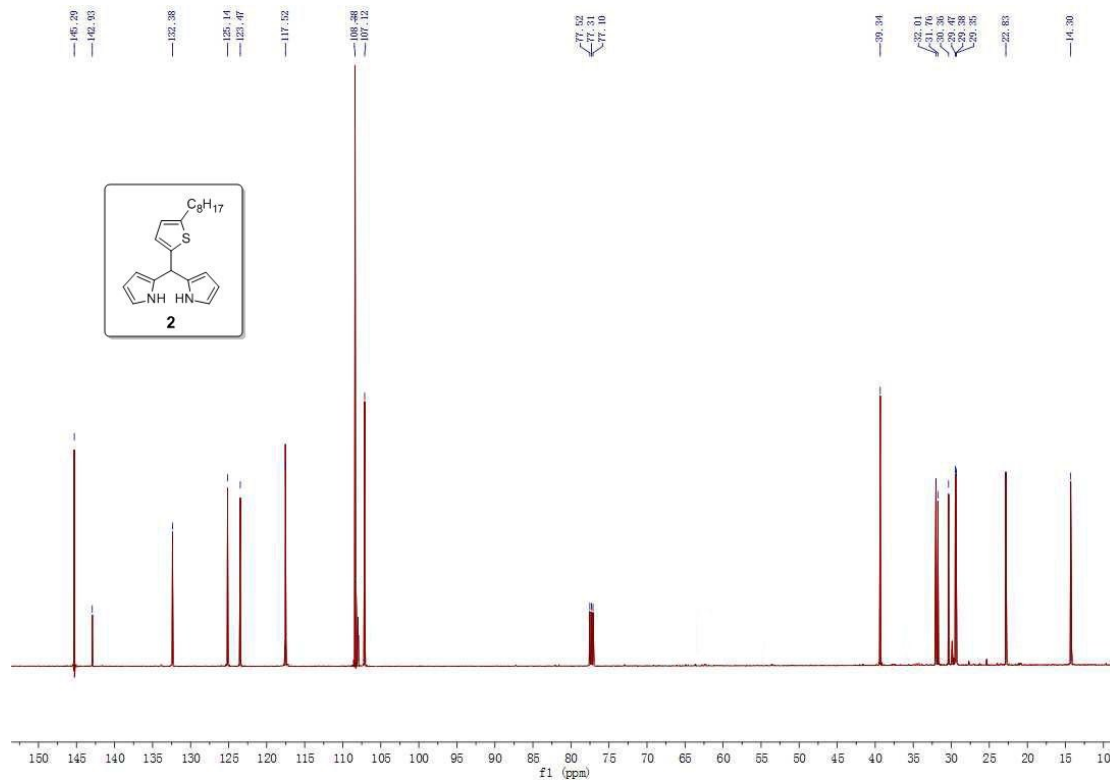

**Fig. 7**  $^{13}\text{C}$  NMR spectrum of compound **2**

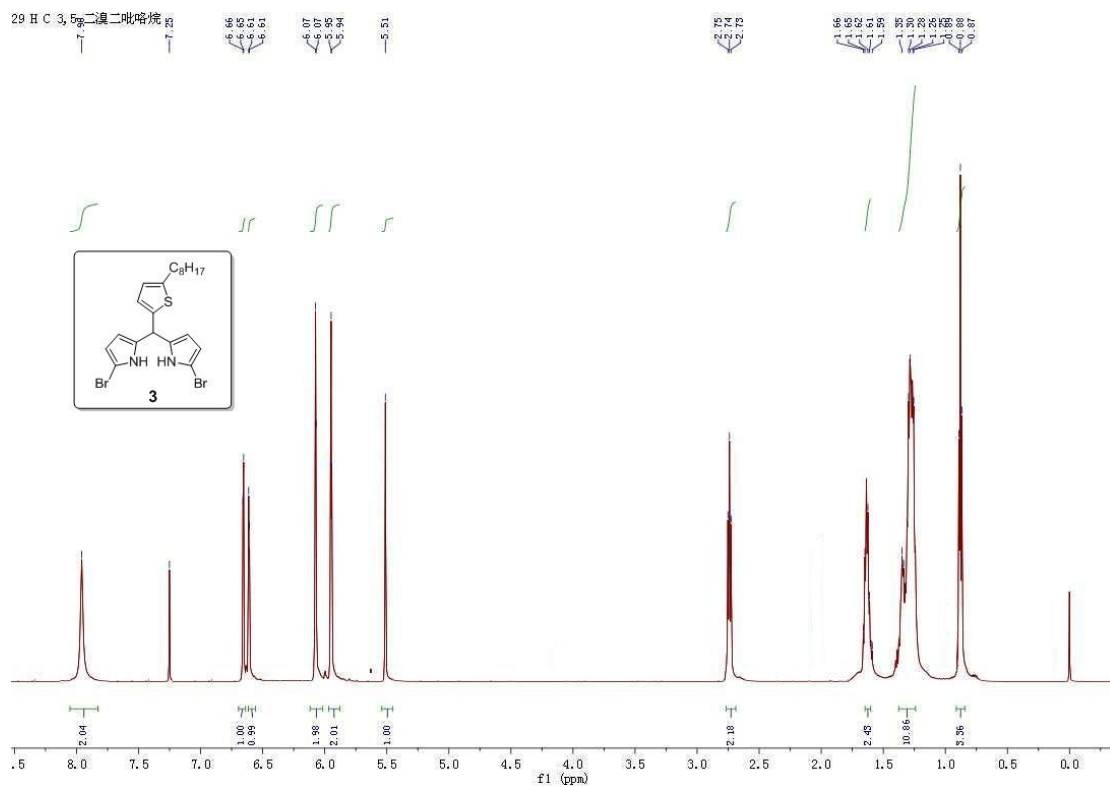

Fig. 8  $^1\text{H}$  NMR spectrum of compound **3**

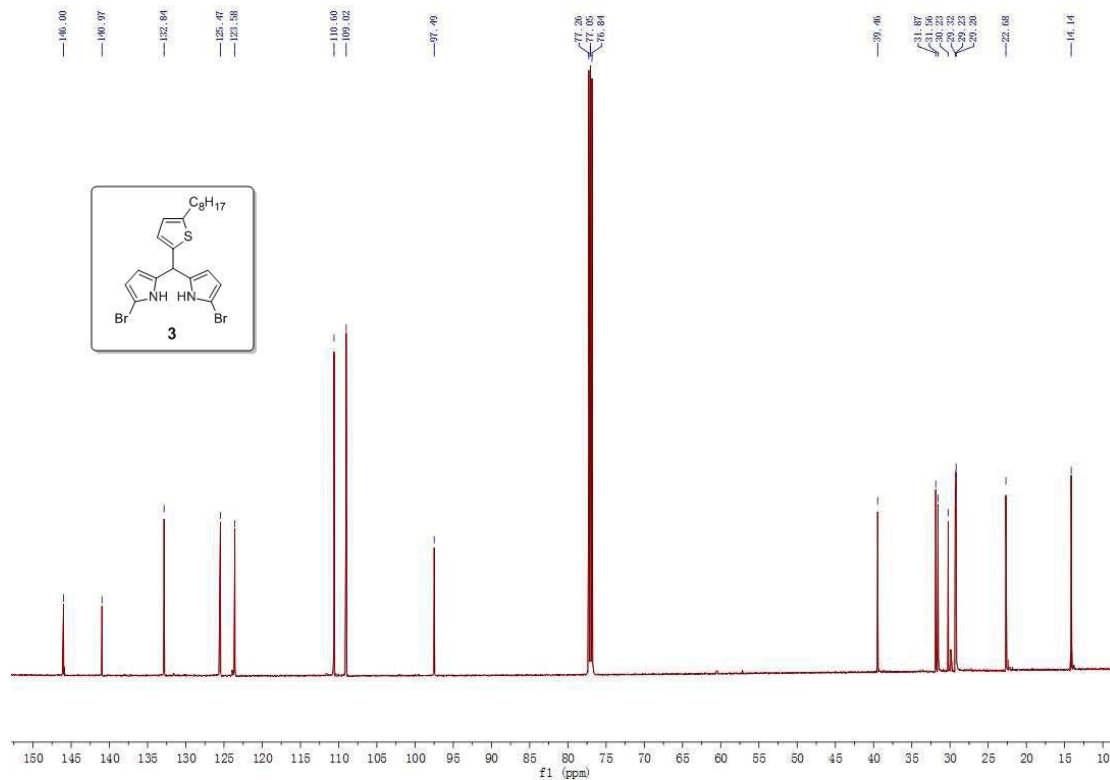

Fig. 9  $^{13}\text{C}$  NMR spectrum of compound **3**

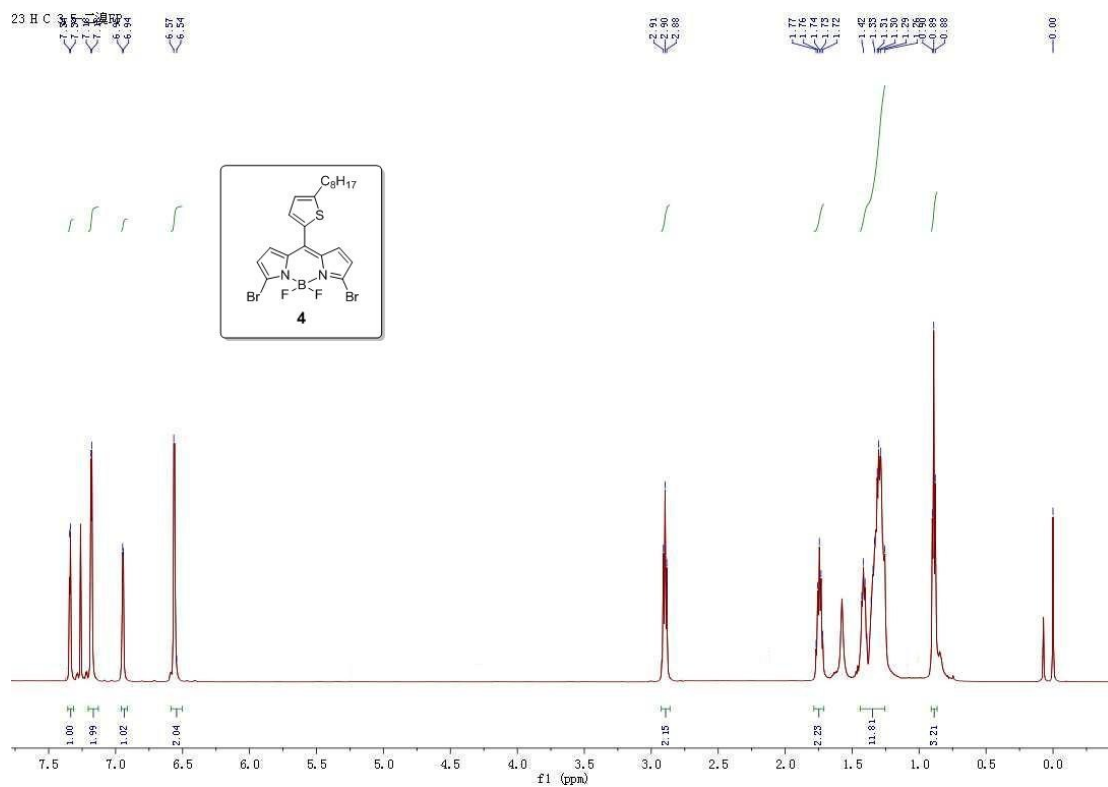

**Fig. 10** <sup>1</sup>H NMR spectrum of compound **4**

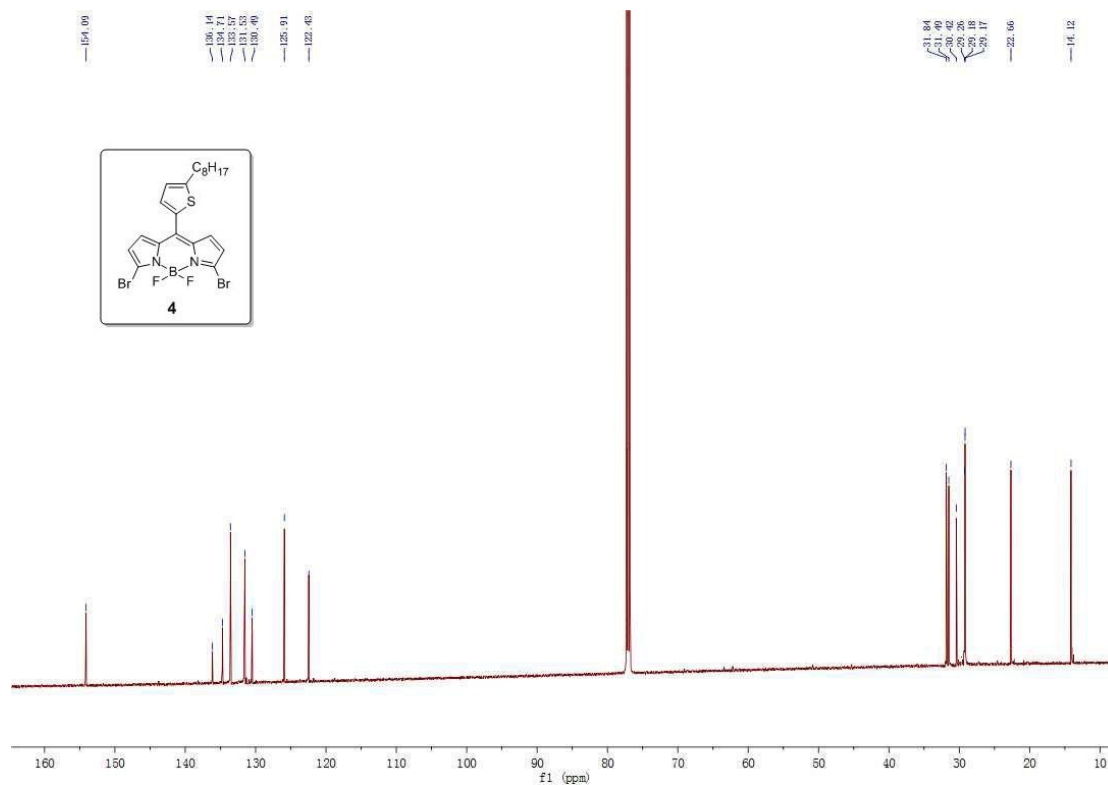

**Fig. 11** <sup>13</sup>C NMR spectrum of compound **4**

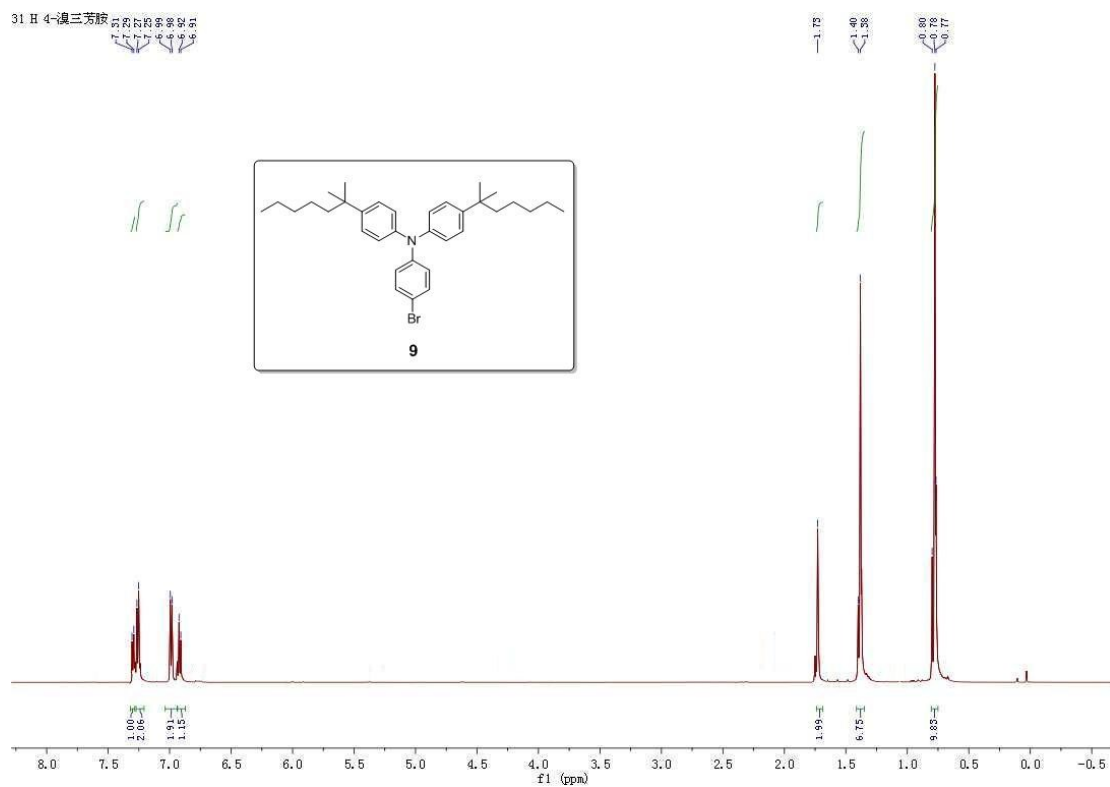

**Fig. 12**  $^1\text{H}$  NMR spectrum of compound **9**

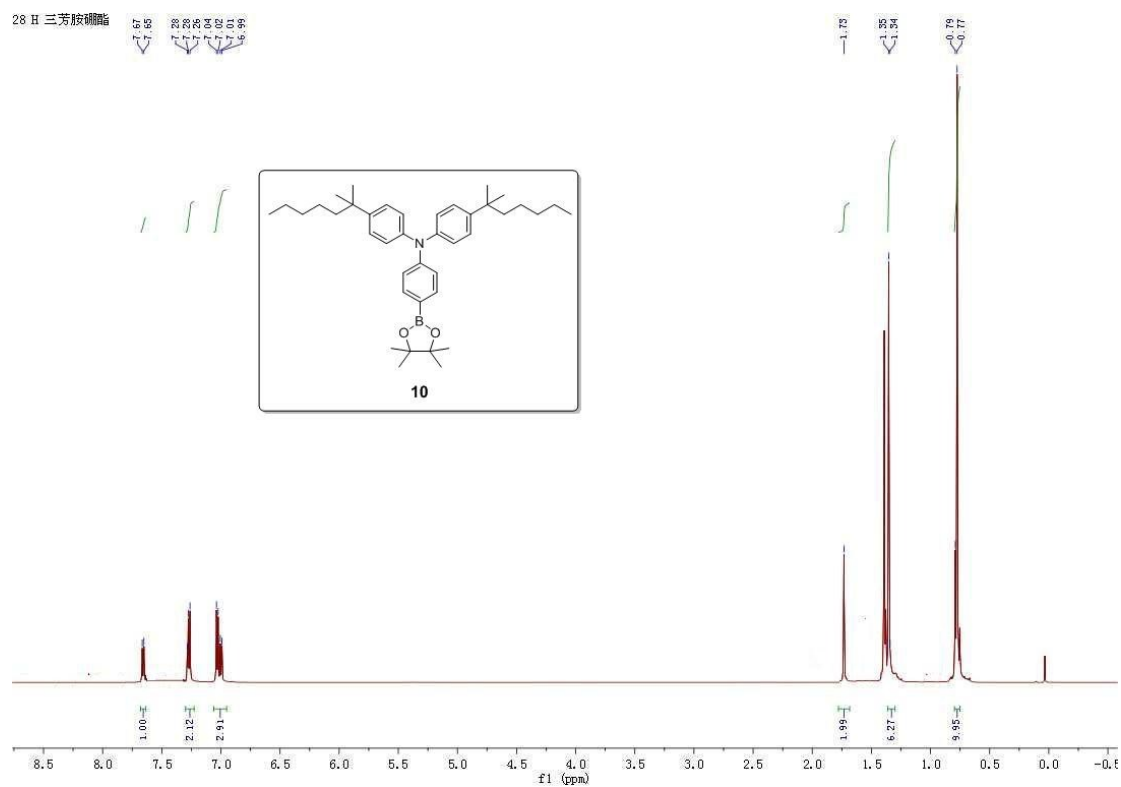

**Fig. 13**  $^1\text{H}$  NMR spectrum of compound **10**



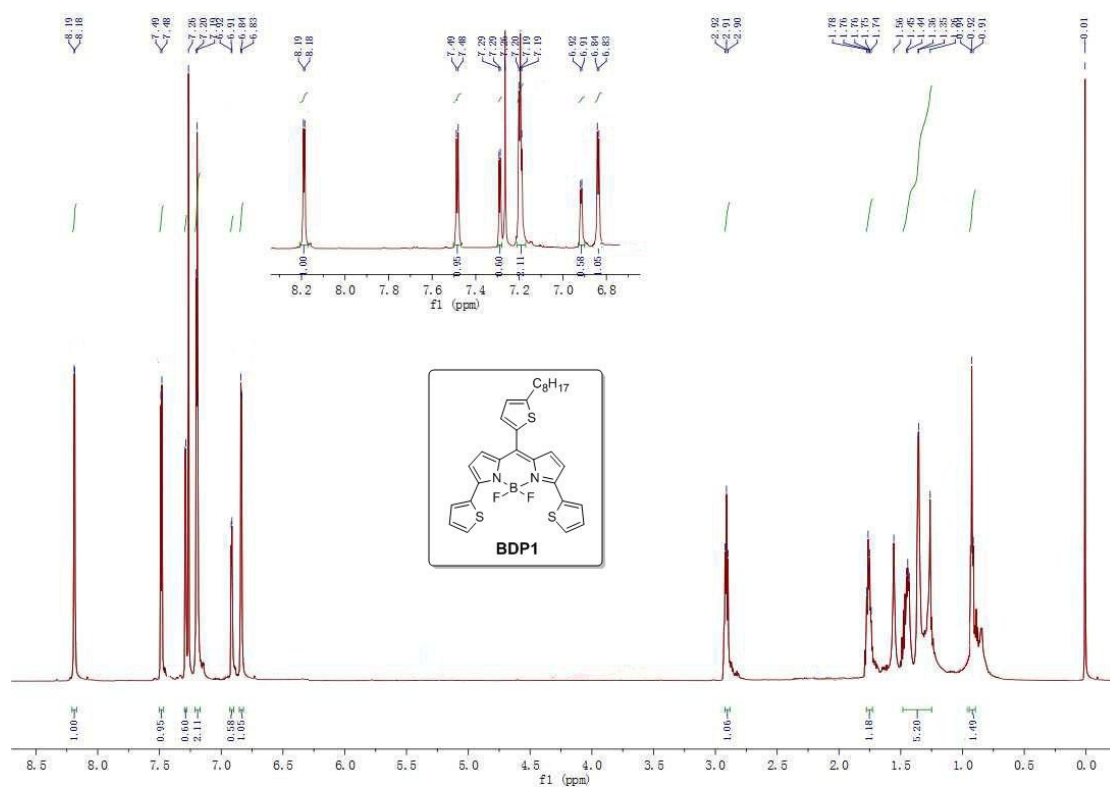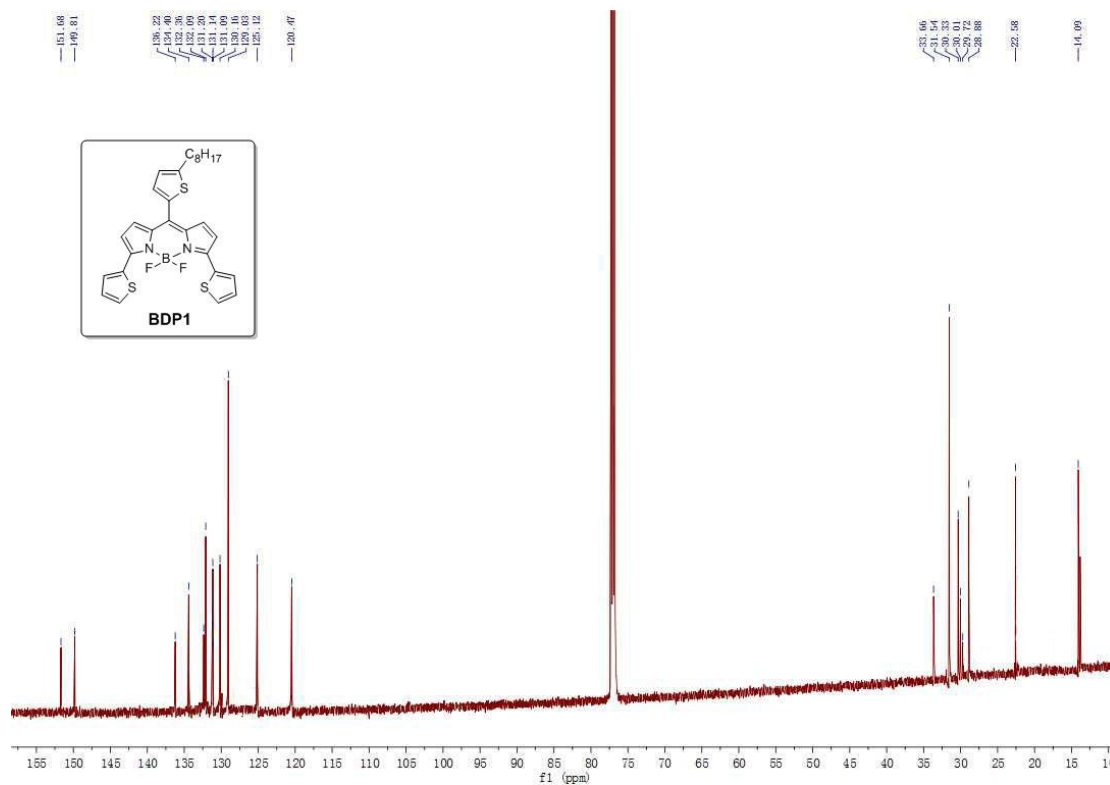

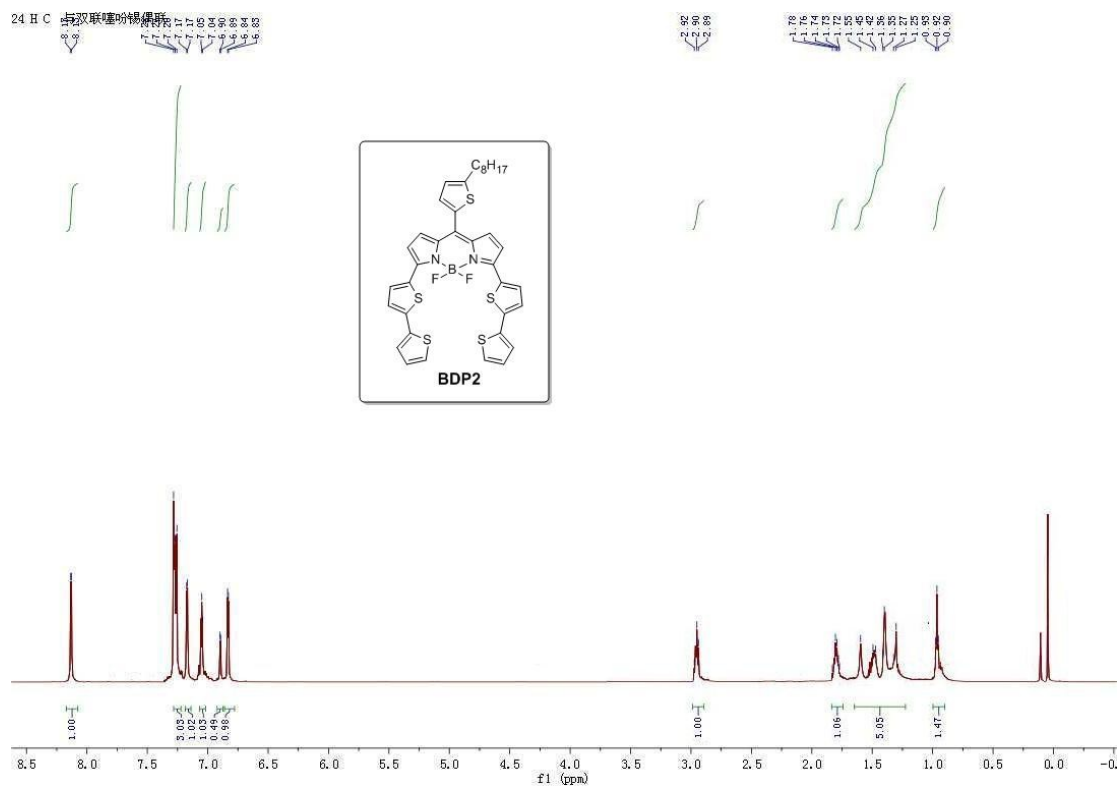

Fig. 16 <sup>1</sup>H NMR spectrum of compound **BDP2**

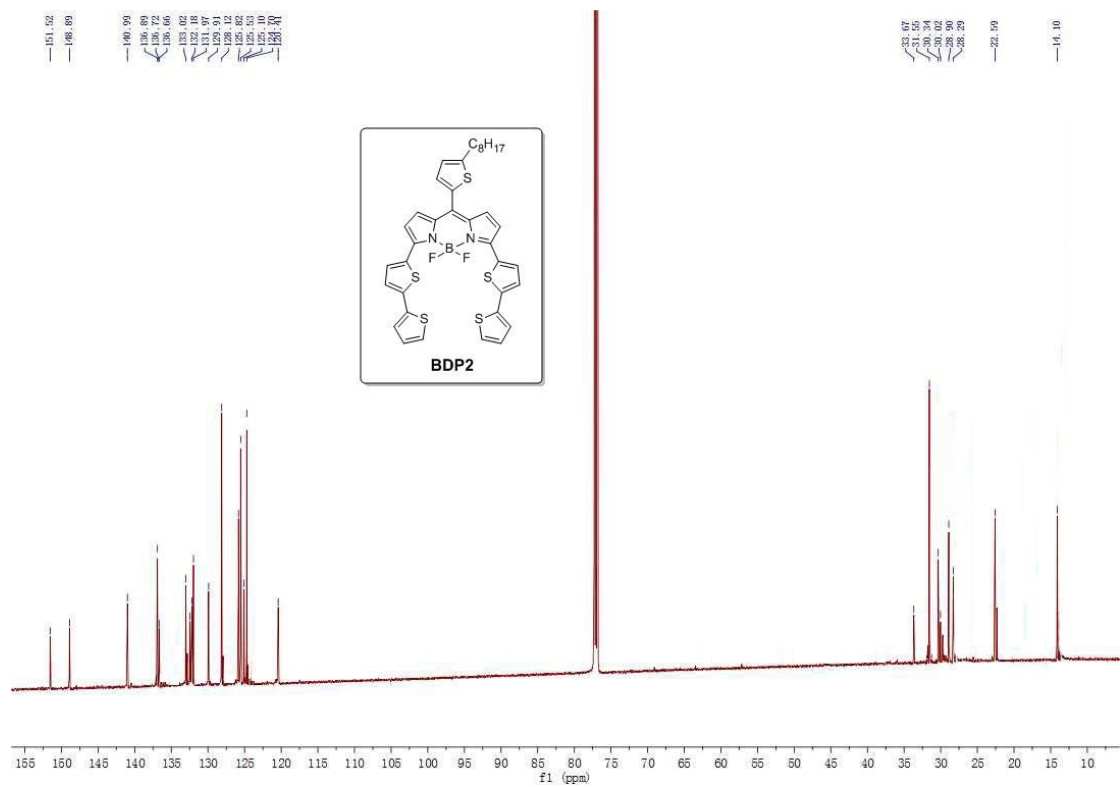

Fig. 17 <sup>13</sup>C NMR spectrum of compound **BDP2**

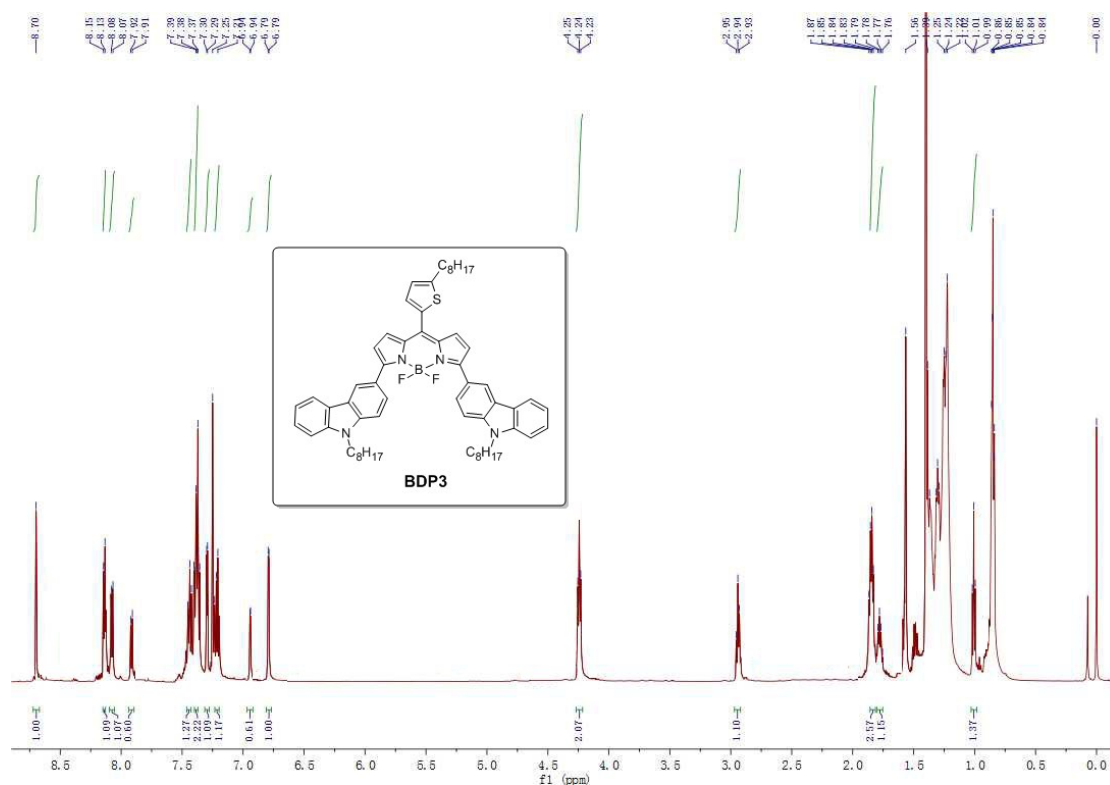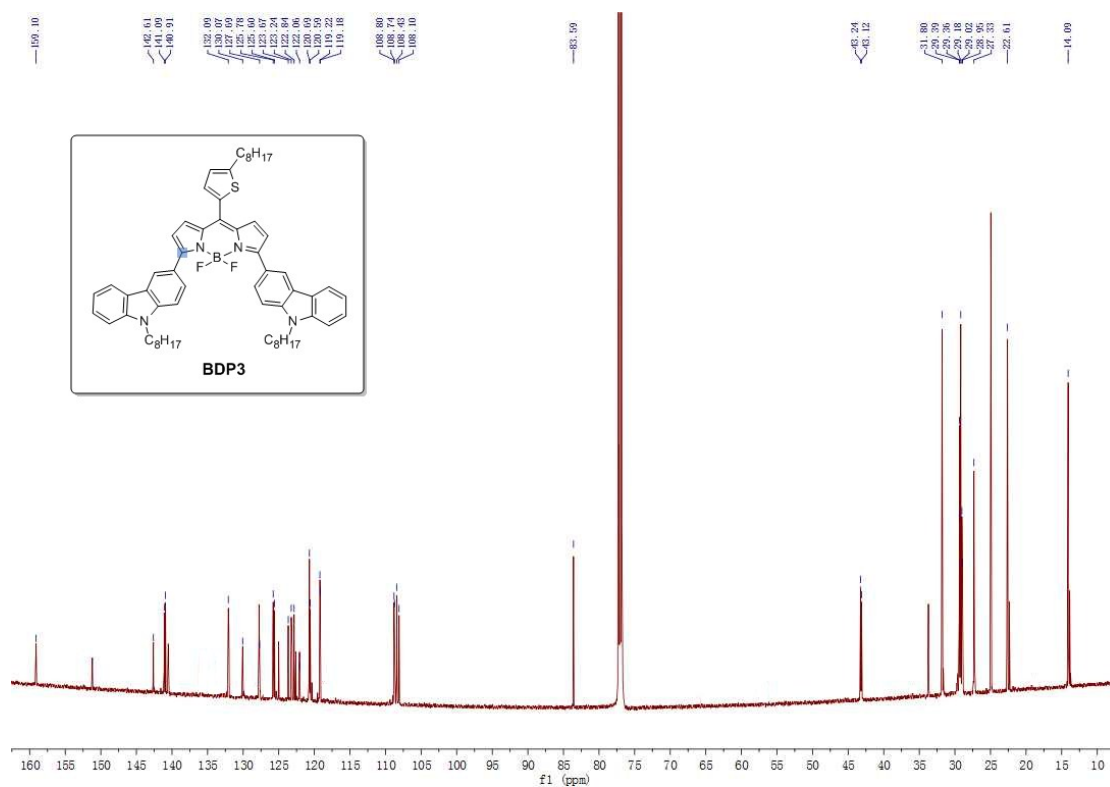

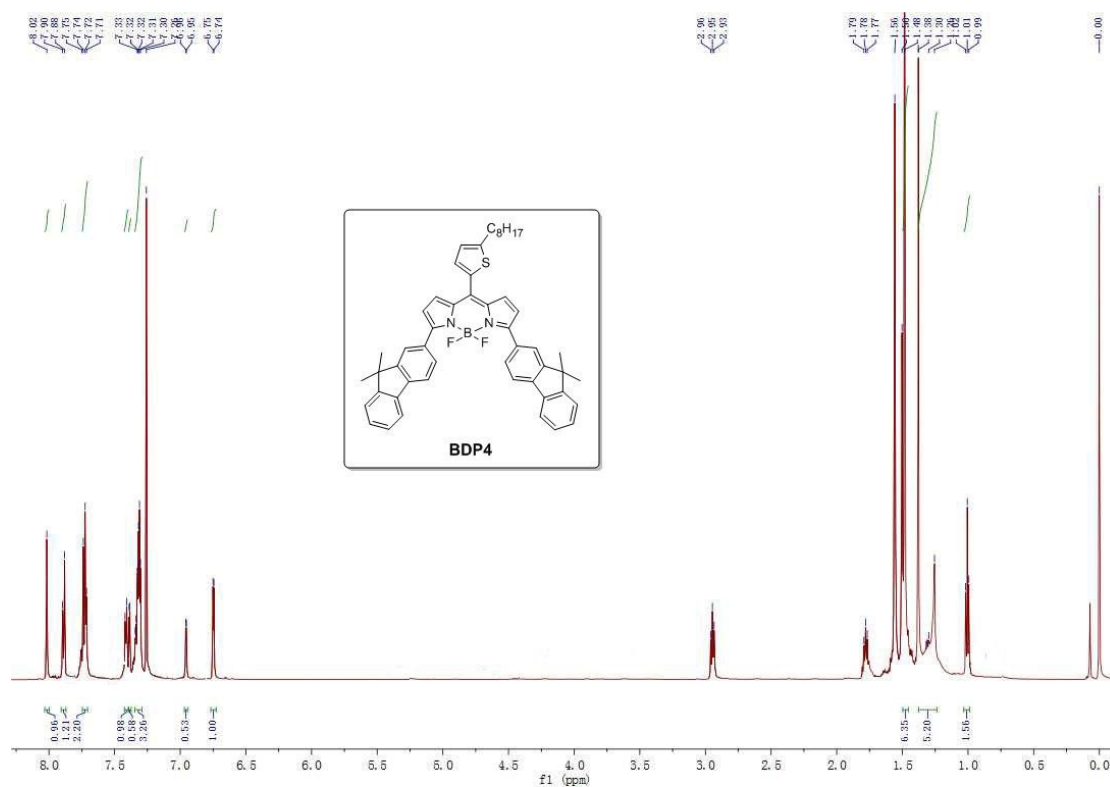

**Fig. 20** <sup>1</sup>H NMR spectrum of compound **BDP4**

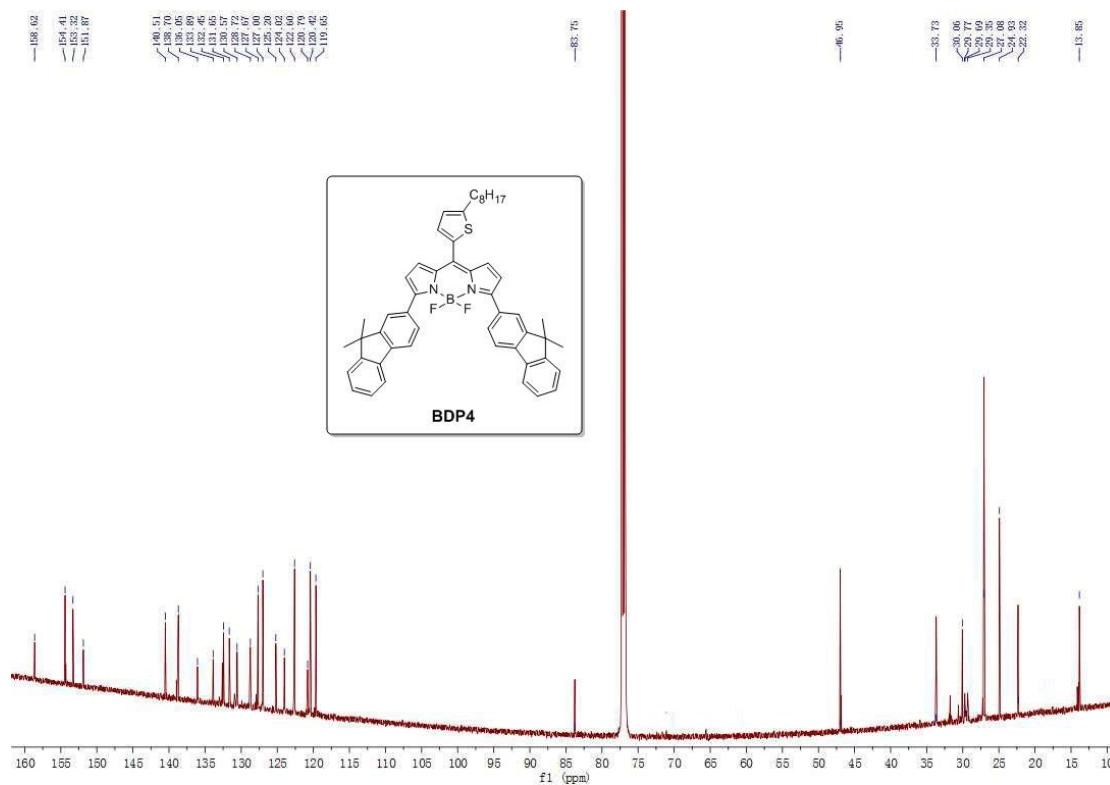

**Fig. 21** <sup>13</sup>C NMR spectrum of compound **BDP4**

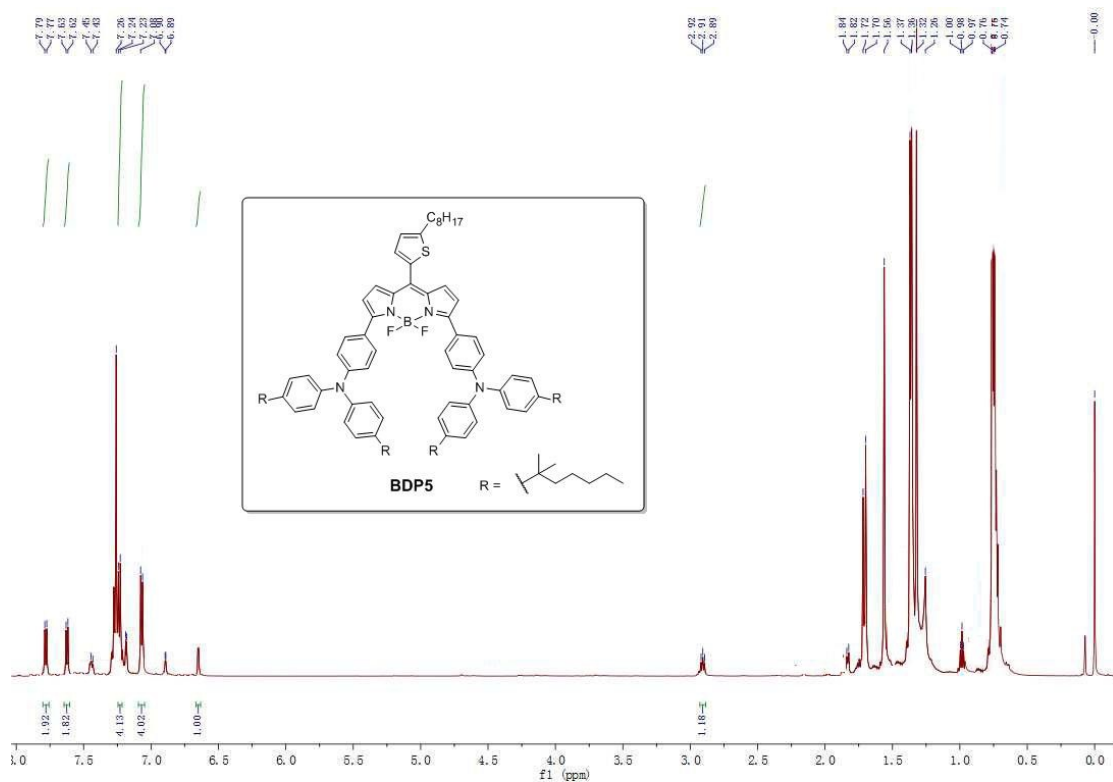

**Fig. 22**  $^1\text{H}$  NMR spectrum of compound **BDP5**

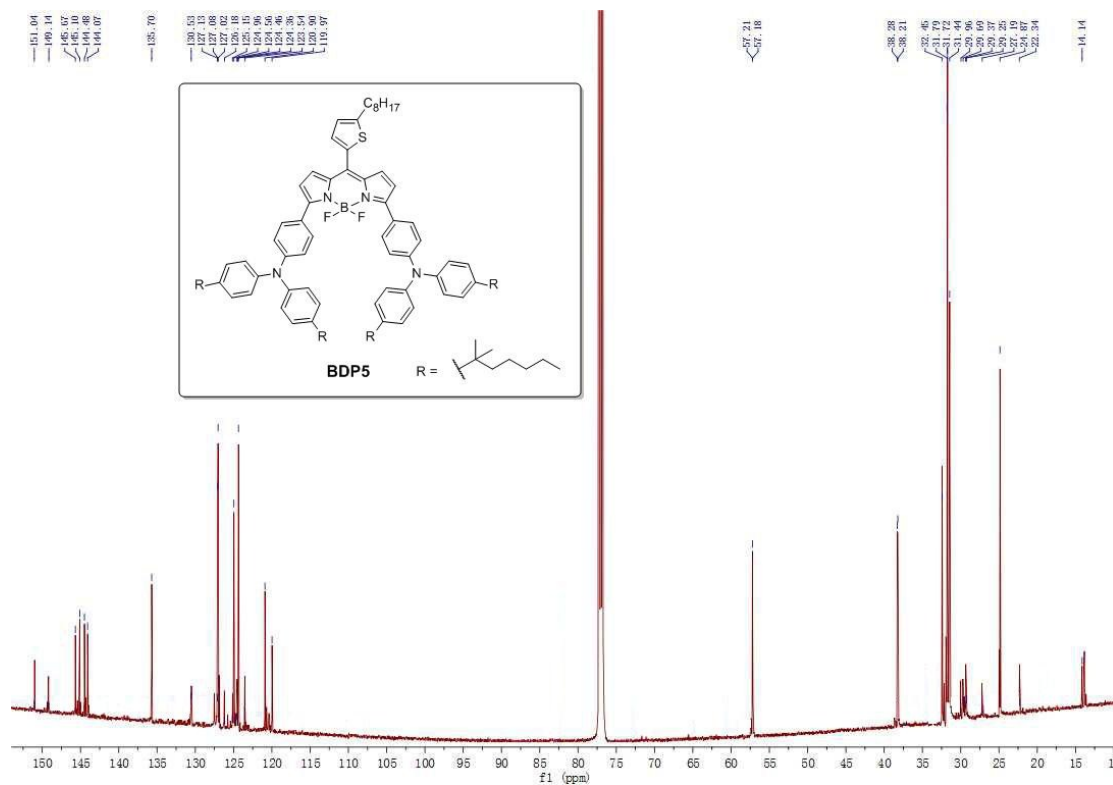

**Fig. 23**  $^{13}\text{C}$  NMR spectrum of compound **BDP5**
